# Supplementary material for: Erratum for “Application of Particle Densimetric Froude Number for Evaluating the Maximum Culvert Scour Depth” by Sheau Maan Tan, Siow-Yong Lim, Maoxing Wei, and Nian-Sheng Cheng
Source: Atypon-hosted journal article supplement (doi:10.1061/(asce)ir.1943-4774.0001502), 2020-07-15
Supplement: supplemental_materials_ir.1943-4774.0001487_tan.pdf [file supplemental_materials_ir.1943-4774.0001487_tan.pdf]

## SUPPLEMENTAL MATERIALS

*ASCE Journal of Irrigation and Drainage Engineering*

# Application of Particle Densimetric Froude Number for Evaluating the Maximum Culvert Scour Depth

Sheau Maan Tan, Siow-Yong Lim, Maoxing Wei, and Nian-Sheng  
Cheng

**DOI:** 10.1061/(ASCE)IR.1943-4774.0001487

© ASCE 2020

[www.ascelibrary.org](http://www.ascelibrary.org)

Compilation of NTU data

| Source     | Type     | Shape    | $d_o$<br>(mm) | $b$<br>(mm) | Side<br>slope | $d_{50}$<br>(mm) | $\sigma_g$ | $H$<br>(mm) | $U_o$<br>(m/s) | Duration<br>(hr) | $d_{sc}$<br>(mm) |
|------------|----------|----------|---------------|-------------|---------------|------------------|------------|-------------|----------------|------------------|------------------|
| Tay (1996) | F        | Circular | 15.0          | -           | -             | 8.7              | 1.11       | 200         | 8.05           | 94               | 100              |
|            | F        | Circular | 15.0          | -           | -             | 8.7              | 1.11       | 200         | 8.46           | 72.75            | 91               |
|            | F        | Circular | 15.0          | -           | -             | 8.7              | 1.11       | 200         | 6.59           | 95               | 95               |
|            | F        | Circular | 15.0          | -           | -             | 8.7              | 1.11       | 200         | 5.41           | 73               | 76               |
|            | F        | Circular | 15.0          | -           | -             | 8.7              | 1.11       | 200         | 6.10           | -                | 89               |
|            | F        | Circular | 15.0          | -           | -             | 8.7              | 1.11       | 200         | 5.62           | -                | 76               |
|            | F        | Circular | 15.0          | -           | -             | 8.7              | 1.11       | 200         | 3.42           | 49               | 57               |
|            | F        | Circular | 15.0          | -           | -             | 8.7              | 1.11       | 100         | 4.01           | 74               | 66               |
|            | F        | Circular | 15.0          | -           | -             | 8.7              | 1.11       | 100         | 2.70           | 48.75            | 30               |
|            | F        | Circular | 15.0          | -           | -             | 8.7              | 1.11       | 100         | 5.08           | 49.75            | 87               |
|            | F        | Circular | 15.0          | -           | -             | 8.7              | 1.11       | 100         | 3.40           | 68.5             | 53               |
|            | F        | Circular | 15.0          | -           | -             | 8.7              | 1.11       | 100         | 5.70           | 53               | 95               |
|            | F        | Circular | 15.0          | -           | -             | 8.7              | 1.11       | 100         | 4.40           | 51.5             | 75               |
|            | F        | Circular | 15.0          | -           | -             | 8.7              | 1.11       | 100         | 7.91           | 48               | 111              |
|            | F        | Circular | 15.0          | -           | -             | 8.7              | 1.11       | 50          | 3.78           | 49.5             | 68               |
|            | F        | Circular | 15.0          | -           | -             | 8.7              | 1.11       | 50          | 4.72           | 72               | 89               |
|            | F        | Circular | 15.0          | -           | -             | 8.7              | 1.11       | 50          | 5.30           | 50               | 74               |
|            | F        | Circular | 15.0          | -           | -             | 8.7              | 1.11       | 50          | 6.34           | 66.5             | 99               |
|            | F        | Circular | 15.0          | -           | -             | 8.7              | 1.11       | 50          | 2.90           | 48               | 50               |
|            | F        | Circular | 15.0          | -           | -             | 8.7              | 1.11       | 50          | 3.42           | 72               | 60               |
| F          | Circular | 15.0     | -             | -           | 8.7           | 1.11             | 50         | 7.03        | 48             | 102              |                  |
| F          | Circular | 15.0     | -             | -           | 8.7           | 1.11             | 18         | 3.58        | 48.5           | 70               |                  |
| F          | Circular | 15.0     | -             | -           | 8.7           | 1.11             | 18         | 3.83        | 49.5           | 73               |                  |

|             |   |          |      |   |   |     |      |     |      |         |     |
|-------------|---|----------|------|---|---|-----|------|-----|------|---------|-----|
|             | F | Circular | 15.0 | - | - | 8.7 | 1.11 | 18  | 4.92 | 49.5    | 81  |
|             | F | Circular | 15.0 | - | - | 8.7 | 1.11 | 18  | 4.31 | 48      | 85  |
|             | F | Circular | 15.0 | - | - | 8.7 | 1.11 | 18  | 5.71 | 48.5    | 95  |
|             | F | Circular | 40.0 | - | - | 8.7 | 1.11 | 270 | 2.05 | 60 - 90 | 59  |
|             | F | Circular | 40.0 | - | - | 8.7 | 1.11 | 270 | 2.54 | 60 - 90 | 80  |
|             | F | Circular | 40.0 | - | - | 8.7 | 1.11 | 270 | 2.87 | 60 - 90 | 99  |
|             | F | Circular | 40.0 | - | - | 8.7 | 1.11 | 270 | 3.22 | 60 - 90 | 106 |
|             | F | Circular | 40.0 | - | - | 8.7 | 1.11 | 270 | 3.55 | 60 - 90 | 120 |
|             | F | Circular | 40.0 | - | - | 8.7 | 1.11 | 270 | 4.30 | 60 - 90 | 137 |
|             | F | Circular | 40.0 | - | - | 8.7 | 1.11 | 350 | 1.38 | 36 - 60 | 25  |
|             | F | Circular | 40.0 | - | - | 8.7 | 1.11 | 350 | 1.71 | 36 - 60 | 36  |
|             | F | Circular | 40.0 | - | - | 8.7 | 1.11 | 350 | 2.05 | 36 - 60 | 57  |
|             | F | Circular | 40.0 | - | - | 8.7 | 1.11 | 350 | 2.35 | 36 - 60 | 71  |
|             | F | Circular | 40.0 | - | - | 8.7 | 1.11 | 350 | 2.85 | 36 - 60 | 92  |
| Seah (1997) | F | Circular | 40.0 | - | - | 8.7 | 1.11 | 350 | 3.44 | 36 - 60 | 102 |
|             | F | Circular | 40.0 | - | - | 8.7 | 1.11 | 350 | 4.00 | 36 - 60 | 118 |
|             | F | Circular | 40.0 | - | - | 8.7 | 1.11 | 350 | 4.39 | 36 - 60 | 127 |
|             | F | Circular | 40.0 | - | - | 8.7 | 1.11 | 500 | 2.06 | 36 - 60 | 52  |
|             | F | Circular | 40.0 | - | - | 8.7 | 1.11 | 500 | 2.47 | 36 - 60 | 75  |
|             | F | Circular | 40.0 | - | - | 8.7 | 1.11 | 500 | 2.95 | 36 - 60 | 82  |
|             | F | Circular | 40.0 | - | - | 8.7 | 1.11 | 500 | 3.49 | 36 - 60 | 112 |
|             | F | Circular | 40.0 | - | - | 8.7 | 1.11 | 500 | 3.94 | 36 - 60 | 126 |
|             | F | Circular | 40.0 | - | - | 8.7 | 1.11 | 500 | 4.47 | 36 - 60 | 139 |
|             | F | Circular | 40.0 | - | - | 8.7 | 1.11 | 20  | 1.35 | 36 - 60 | 59  |
|             | F | Circular | 40.0 | - | - | 8.7 | 1.11 | 20  | 1.99 | 36 - 60 | 84  |
|             | F | Circular | 40.0 | - | - | 8.7 | 1.11 | 20  | 2.18 | 36 - 60 | 90  |
|             | F | Circular | 40.0 | - | - | 8.7 | 1.11 | 20  | 2.75 | 36 - 60 | 117 |

|            |   |          |      |   |   |      |      |     |       |         |     |
|------------|---|----------|------|---|---|------|------|-----|-------|---------|-----|
|            | F | Circular | 40.0 | - | - | 8.7  | 1.11 | 20  | 3.32  | 36 - 60 | 117 |
|            | F | Circular | 40.0 | - | - | 8.7  | 1.11 | 20  | 3.89  | 36 - 60 | 127 |
|            | F | Circular | 5.0  | - | - | 2.68 | 1.33 | 150 | 12.61 | >18     | 60  |
|            | F | Circular | 5.0  | - | - | 2.68 | 1.33 | 150 | 9.41  | >18     | 55  |
|            | F | Circular | 5.0  | - | - | 2.68 | 1.33 | 150 | 8.15  | >18     | 48  |
|            | F | Circular | 5.0  | - | - | 2.68 | 1.33 | 150 | 6.08  | >18     | 30  |
|            | F | Circular | 5.0  | - | - | 2.68 | 1.33 | 150 | 6.71  | >18     | 39  |
|            | F | Circular | 5.0  | - | - | 2.55 | 1.45 | 150 | 10.98 | >18     | 64  |
|            | F | Circular | 5.0  | - | - | 2.55 | 1.45 | 150 | 10.42 | >18     | 58  |
|            | F | Circular | 5.0  | - | - | 2.55 | 1.45 | 150 | 10.21 | >18     | 58  |
|            | F | Circular | 5.0  | - | - | 2.55 | 1.45 | 150 | 8.57  | >18     | 42  |
|            | F | Circular | 5.0  | - | - | 2.55 | 1.45 | 150 | 7.36  | >18     | 38  |
|            | F | Circular | 5.0  | - | - | 2.55 | 1.45 | 150 | 6.35  | >18     | 32  |
|            | F | Circular | 5.0  | - | - | 2.57 | 1.66 | 150 | 10.42 | >18     | 57  |
| Lau (1998) | F | Circular | 5.0  | - | - | 2.57 | 1.66 | 150 | 12.42 | >18     | 65  |
|            | F | Circular | 5.0  | - | - | 2.57 | 1.66 | 150 | 7.93  | >18     | 41  |
|            | F | Circular | 5.0  | - | - | 2.57 | 1.66 | 150 | 8.95  | >18     | 53  |
|            | F | Circular | 5.0  | - | - | 2.57 | 1.66 | 150 | 7.57  | >18     | 37  |
|            | F | Circular | 5.0  | - | - | 2.37 | 1.77 | 150 | 7.45  | >18     | 37  |
|            | F | Circular | 5.0  | - | - | 2.37 | 1.77 | 150 | 9.89  | >18     | 59  |
|            | F | Circular | 5.0  | - | - | 2.37 | 1.77 | 150 | 11.82 | >18     | 65  |
|            | F | Circular | 5.0  | - | - | 2.37 | 1.77 | 150 | 12.49 | >18     | 66  |
|            | F | Circular | 5.0  | - | - | 2.37 | 1.77 | 150 | 6.85  | >18     | 29  |
|            | F | Circular | 5.0  | - | - | 2.37 | 1.77 | 150 | 8.87  | >18     | 43  |
|            | F | Circular | 5.0  | - | - | 2.35 | 2.16 | 150 | 7.68  | >18     | 43  |
|            | F | Circular | 5.0  | - | - | 2.35 | 2.16 | 150 | 9.38  | >18     | 55  |
|            | F | Circular | 5.0  | - | - | 2.35 | 2.16 | 150 | 10.72 | >18     | 63  |

|             |   |          |      |   |   |      |      |     |       |     |      |
|-------------|---|----------|------|---|---|------|------|-----|-------|-----|------|
|             | F | Circular | 5.0  | - | - | 2.35 | 2.16 | 150 | 12.58 | >18 | 70   |
|             | F | Circular | 5.0  | - | - | 2.35 | 2.16 | 150 | 8.58  | >18 | 55   |
|             | F | Circular | 5.0  | - | - | 2.35 | 2.16 | 150 | 9.78  | >18 | 63   |
|             | F | Circular | 5.9  | - | - | 3.97 | 4.09 | 200 | 12.83 | >24 | 59   |
|             | F | Circular | 5.9  | - | - | 3.97 | 4.09 | 200 | 9.87  | >24 | 47.5 |
|             | F | Circular | 5.9  | - | - | 3.97 | 4.09 | 200 | 8.48  | >24 | 39.5 |
|             | F | Circular | 5.9  | - | - | 3.97 | 4.09 | 200 | 6.23  | >24 | 23.5 |
|             | F | Circular | 5.9  | - | - | 3.97 | 4.09 | 200 | 4.37  | >24 | 11.5 |
|             | F | Circular | 9.7  | - | - | 3.97 | 4.09 | 200 | 6.76  | >24 | 60.5 |
|             | F | Circular | 9.7  | - | - | 3.97 | 4.09 | 200 | 6.31  | >24 | 60   |
|             | F | Circular | 9.7  | - | - | 3.97 | 4.09 | 200 | 5.57  | >24 | 46   |
|             | F | Circular | 9.7  | - | - | 3.97 | 4.09 | 200 | 5.06  | >24 | 41   |
|             | F | Circular | 9.7  | - | - | 3.97 | 4.09 | 200 | 4.64  | >24 | 39   |
|             | F | Circular | 9.7  | - | - | 3.97 | 4.09 | 200 | 3.93  | >24 | 26.5 |
|             | F | Circular | 9.7  | - | - | 3.97 | 4.09 | 200 | 3.17  | >24 | 20   |
| Chia (2000) | F | Circular | 13.4 | - | - | 3.97 | 4.09 | 200 | 3.78  | >24 | 50   |
|             | F | Circular | 13.4 | - | - | 3.97 | 4.09 | 200 | 3.66  | >24 | 50   |
|             | F | Circular | 13.4 | - | - | 3.97 | 4.09 | 200 | 3.24  | >24 | 41.5 |
|             | F | Circular | 13.4 | - | - | 3.97 | 4.09 | 200 | 2.93  | >24 | 35.5 |
|             | F | Circular | 13.4 | - | - | 3.97 | 4.09 | 200 | 2.43  | >24 | 33   |
|             | F | Circular | 13.4 | - | - | 3.97 | 4.09 | 200 | 2.25  | >24 | 26.5 |
|             | F | Circular | 17.0 | - | - | 3.97 | 4.09 | 200 | 4.03  | >24 | 64   |
|             | F | Circular | 17.0 | - | - | 3.97 | 4.09 | 200 | 3.44  | >24 | 52   |
|             | F | Circular | 17.0 | - | - | 3.97 | 4.09 | 200 | 3.11  | >24 | 45   |
|             | F | Circular | 17.0 | - | - | 3.97 | 4.09 | 200 | 2.79  | >24 | 32   |
|             | F | Circular | 17.0 | - | - | 3.97 | 4.09 | 200 | 2.53  | >24 | 26.5 |
|             | F | Circular | 17.0 | - | - | 3.97 | 4.09 | 200 | 2.33  | >24 | 24   |

|               |   |          |      |   |   |      |       |     |      |       |      |
|---------------|---|----------|------|---|---|------|-------|-----|------|-------|------|
|               | F | Circular | 17.0 | - | - | 3.97 | 4.09  | 200 | 2.14 | >24   | 21   |
|               | F | Circular | 17.0 | - | - | 3.97 | 4.09  | 200 | 1.91 | >24   | 18   |
|               | F | Circular | 17.0 | - | - | 3.97 | 4.09  | 200 | 1.60 | >24   | 14.5 |
| Tan (2003)    | F | Circular | 25.4 | - | - | 1.6  | 1.13  | 250 | 1.16 | 67    | 62   |
|               | F | Circular | 25.4 | - | - | 1.6  | 1.13  | 250 | 1.51 | 72    | 96   |
|               | F | Circular | 25.4 | - | - | 1.6  | 1.13  | 250 | 1.83 | 92    | 109  |
|               | F | Circular | 25.4 | - | - | 1.6  | 1.13  | 250 | 1.91 | 69    | 110  |
|               | F | Circular | 25.4 | - | - | 1.6  | 1.13  | 250 | 2.00 | 93    | 112  |
|               | F | Circular | 25.4 | - | - | 1.6  | 1.13  | 250 | 2.47 | 69    | 120  |
| Zaihan (2014) | F | Circular | 4.0  | - | - | 1.55 | 1.2   | 120 | 1.76 | 24    | 23   |
|               | F | Circular | 4.0  | - | - | 1.55 | 1.2   | 90  | 2.11 | 24    | 24   |
|               | F | Circular | 4.0  | - | - | 1.55 | 1.2   | 90  | 1.50 | 22    | 15   |
|               | F | Circular | 4.0  | - | - | 1.55 | 1.2   | 60  | 2.12 | 19    | 24.8 |
|               | F | Circular | 4.0  | - | - | 1.55 | 1.2   | 60  | 1.50 | 25    | 17.5 |
|               | F | Circular | 4.0  | - | - | 1.55 | 1.2   | 30  | 2.11 | 21    | 26   |
|               | F | Circular | 4.0  | - | - | 1.55 | 1.2   | 30  | 1.50 | 25    | 19   |
|               | F | Circular | 4.0  | - | - | 0.77 | 1.15  | 90  | 2.13 | 20    | 33   |
|               | F | Circular | 4.0  | - | - | 0.77 | 1.15  | 90  | 1.52 | 20    | 27.4 |
|               | F | Circular | 4.0  | - | - | 0.77 | 1.15  | 60  | 2.15 | 22    | 34.9 |
|               | F | Circular | 4.0  | - | - | 0.77 | 1.15  | 60  | 1.51 | 23    | 26.4 |
|               | F | Circular | 4.0  | - | - | 0.77 | 1.15  | 30  | 2.15 | 23    | 33.8 |
| Pee (2016)    | F | Circular | 4.0  | - | - | 0.77 | 1.15  | 30  | 1.52 | 20    | 27.3 |
|               | F | Circular | 16.0 | - | - | 0.77 | 1.165 | 240 | 0.61 | 46.83 | 27.7 |
|               | F | Circular | 16.0 | - | - | 0.77 | 1.165 | 240 | 0.80 | 43.83 | 37.8 |
|               | F | Circular | 16.0 | - | - | 0.77 | 1.165 | 240 | 0.61 | 44.5  | 27.5 |
|               | F | Circular | 16.0 | - | - | 0.77 | 1.165 | 240 | 1.01 | 47.25 | 45.7 |
|               | F | Circular | 16.0 | - | - | 0.77 | 1.165 | 240 | 1.10 | 46.5  | 51.1 |

|  |   |          |      |   |   |      |       |     |      |       |      |
|--|---|----------|------|---|---|------|-------|-----|------|-------|------|
|  | F | Circular | 20.0 | - | - | 0.77 | 1.165 | 300 | 0.60 | 47.17 | 27.3 |
|  | F | Circular | 20.0 | - | - | 0.77 | 1.165 | 300 | 0.80 | 44.83 | 40.9 |
|  | F | Circular | 20.0 | - | - | 0.77 | 1.165 | 300 | 0.99 | 43.92 | 53.7 |
|  | F | Circular | 20.0 | - | - | 0.77 | 1.165 | 300 | 0.50 | 42.67 | 21.9 |
|  | F | Circular | 12.0 | - | - | 0.77 | 1.165 | 180 | 0.60 | 47.5  | 20   |
|  | F | Circular | 12.0 | - | - | 0.77 | 1.165 | 180 | 0.80 | 48    | 29.1 |
|  | F | Circular | 12.0 | - | - | 0.77 | 1.165 | 180 | 1.00 | 48    | 40.7 |
|  | F | Circular | 12.0 | - | - | 0.77 | 1.165 | 180 | 1.20 | 45.25 | 46.8 |
|  | F | Circular | 12.0 | - | - | 0.77 | 1.165 | 180 | 0.80 | 46.33 | 31.9 |
|  | F | Circular | 12.0 | - | - | 0.77 | 1.165 | 180 | 0.60 | 45.5  | 23   |
|  | F | Circular | 8.0  | - | - | 0.77 | 1.165 | 120 | 2.10 | 47    | 54   |
|  | F | Circular | 8.0  | - | - | 0.77 | 1.165 | 120 | 1.50 | 43.83 | 43.7 |
|  | F | Circular | 8.0  | - | - | 0.77 | 1.165 | 120 | 1.20 | 47.5  | 39.2 |
|  | F | Circular | 8.0  | - | - | 0.77 | 1.165 | 120 | 1.00 | 46.67 | 35.1 |
|  | F | Circular | 27.5 | - | - | 0.5  | 1.45  | 28  | 0.75 | 47.5  | 73.5 |
|  | F | Circular | 27.5 | - | - | 0.5  | 1.45  | 14  | 0.73 | 47.5  | 49.6 |
|  | F | Circular | 27.5 | - | - | 0.5  | 1.45  | 110 | 0.82 | 44.5  | 54.3 |
|  | F | Circular | 27.5 | - | - | 0.5  | 1.45  | 55  | 0.83 | 47.8  | 51.3 |
|  | F | Circular | 27.5 | - | - | 0.5  | 1.45  | 28  | 0.83 | 44.2  | 78.5 |
|  | F | Circular | 27.5 | - | - | 0.5  | 1.45  | 14  | 0.80 | 47.2  | 48.7 |
|  | F | Circular | 27.5 | - | - | 0.5  | 1.45  | 110 | 0.99 | 47.5  | 67.5 |
|  | F | Circular | 27.5 | - | - | 0.5  | 1.45  | 55  | 1.03 | 47.5  | 82.5 |
|  | F | Circular | 27.5 | - | - | 0.5  | 1.45  | 28  | 0.99 | 47.5  | 90   |
|  | F | Circular | 27.5 | - | - | 0.5  | 1.45  | 14  | 0.99 | 47.5  | 65.2 |
|  | F | Circular | 27.5 | - | - | 0.5  | 1.45  | 110 | 1.14 | 44.5  | 83.1 |
|  | F | Circular | 27.5 | - | - | 0.5  | 1.45  | 55  | 1.16 | 47.2  | 94.4 |
|  | F | Circular | 27.5 | - | - | 0.5  | 1.45  | 28  | 1.16 | 47    | 87.4 |

Salam  
(2016)

|              |   |          |      |   |   |      |      |     |      |      |      |
|--------------|---|----------|------|---|---|------|------|-----|------|------|------|
|              | F | Circular | 27.5 | - | - | 0.5  | 1.45 | 14  | 1.04 | 45   | 68.5 |
|              | F | Circular | 27.5 | - | - | 0.5  | 1.45 | 110 | 1.26 | 45   | 88   |
|              | F | Circular | 27.5 | - | - | 0.5  | 1.45 | 55  | 1.26 | 47.5 | 94.3 |
|              | F | Circular | 15.0 | - | - | 1.65 | 2.5  | 35  | 2.87 | 91.3 | 62   |
|              | F | Circular | 15.0 | - | - | 1.65 | 2.5  | 50  | 2.87 | 75.5 | 72   |
|              | F | Circular | 15.0 | - | - | 1.65 | 2.5  | 100 | 2.87 | 99   | 52   |
|              | F | Circular | 15.0 | - | - | 1.65 | 2.5  | 150 | 2.87 | 68   | 55   |
|              | F | Circular | 15.0 | - | - | 1.65 | 2.5  | 15  | 2.87 | 43   | 61   |
|              | F | Circular | 15.0 | - | - | 1.65 | 2.5  | 75  | 2.87 | 47.5 | 57.5 |
|              | F | Circular | 15.0 | - | - | 1.65 | 2.5  | 60  | 2.87 | 114  | 56   |
|              | F | Circular | 15.0 | - | - | 1.65 | 2.5  | 6   | 2.87 | -    | 73   |
|              | F | Circular | 15.0 | - | - | 1.65 | 2.5  | 50  | 2.87 | -    | 54   |
|              | F | Circular | 25.4 | - | - | 0.25 | 1.44 | 25  | 1.51 | -    | 92   |
|              | F | Circular | 25.4 | - | - | 0.25 | 1.44 | 25  | 1.59 | -    | 95   |
|              | F | Circular | 25.4 | - | - | 0.25 | 1.44 | 50  | 1.59 | -    | 92   |
| Current data | F | Circular | 25.4 | - | - | 0.25 | 1.44 | 100 | 1.60 | -    | 115  |
|              | F | Circular | 25.4 | - | - | 0.25 | 1.44 | 100 | 1.51 | -    | 100  |
|              | F | Circular | 25.4 | - | - | 0.25 | 1.44 | 100 | 1.54 | -    | 103  |
|              | F | Circular | 25.4 | - | - | 0.25 | 1.44 | 150 | 1.52 | -    | 96   |
|              | F | Circular | 25.4 | - | - | 0.25 | 1.44 | 150 | 1.60 | -    | 130  |
|              | F | Circular | 15.0 | - | - | 1.65 | 1.25 | 33  | 2.87 | -    | 75   |
|              | F | Circular | 15.0 | - | - | 1.65 | 1.25 | 90  | 2.87 | -    | 85   |
|              | F | Circular | 15.0 | - | - | 1.65 | 1.25 | 50  | 2.87 | -    | 98   |
|              | F | Circular | 15.0 | - | - | 1.65 | 1.25 | 75  | 2.87 | -    | 89   |
|              | F | Circular | 15.0 | - | - | 1.65 | 1.25 | 95  | 2.87 | -    | 87   |
|              | F | Circular | 15.0 | - | - | 1.65 | 1.25 | 7   | 2.87 | -    | 73   |
|              | F | Circular | 15.0 | - | - | 1.65 | 3.26 | 200 | 2.16 | 66   | 26   |



|                |          |             |      |    |      |      |      |      |      |       |    |
|----------------|----------|-------------|------|----|------|------|------|------|------|-------|----|
| F              | Circular | 15.0        | -    | -  | 1.65 | 3.26 | 200  | 2.87 | 71   | 43    |    |
| F              | Circular | 15.0        | -    | -  | 1.65 | 3.26 | 200  | 3.48 | 160  | 56    |    |
| F              | Circular | 15.0        | -    | -  | 1.65 | 3.26 | 200  | 4.55 | 89   | 73    |    |
| F              | Circular | 15.0        | -    | -  | 1.65 | 3.26 | 200  | 5.09 | 167  | 101   |    |
| F              | Circular | 25.4        | -    | -  | 8.7  | 1.11 | 13   | 3.10 | 36   | 73    |    |
| F              | Circular | 25.4        | -    | -  | 8.7  | 1.11 | 13   | 3.64 | 36   | 84    |    |
| F              | Circular | 25.4        | -    | -  | 8.7  | 1.11 | 13   | 1.86 | 36   | 59    |    |
| F              | Circular | 25.4        | -    | -  | 8.7  | 1.11 | 13   | 2.38 | 36   | 60    |    |
| F              | Circular | 25.4        | -    | -  | 8.7  | 1.11 | 13   | 1.42 | 36   | 41    |    |
| F              | Circular | 25.4        | -    | -  | 8.7  | 1.11 | 13   | 2.67 | 36   | 71    |    |
| F              | Circular | 25.4        | -    | -  | 8.7  | 1.11 | 200  | 3.59 | 36   | 88    |    |
| F              | Circular | 25.4        | -    | -  | 8.7  | 1.11 | 200  | 2.74 | 36   | 50    |    |
| F              | Circular | 25.4        | -    | -  | 8.7  | 1.11 | 200  | 2.05 | 36   | 44    |    |
| F              | Circular | 25.4        | -    | -  | 8.7  | 1.11 | 200  | 2.35 | 36   | 50    |    |
| F              | Circular | 25.4        | -    | -  | 8.7  | 1.11 | 200  | 2.57 | 36   | 52    |    |
| F              | Circular | 25.4        | -    | -  | 8.7  | 1.11 | 200  | 3.14 | 36   | 69    |    |
| F              | Circular | 25.4        | -    | -  | 4.9  | 1.17 | 13   | 2.72 | 36   | 107   |    |
| F              | Circular | 25.4        | -    | -  | 4.9  | 1.17 | 13   | 1.01 | 36   | 43    |    |
| F              | Circular | 25.4        | -    | -  | 4.9  | 1.17 | 13   | 1.50 | 36   | 65    |    |
| F              | Circular | 25.4        | -    | -  | 4.9  | 1.17 | 13   | 3.35 | 36   | 114   |    |
| F              | Circular | 25.4        | -    | -  | 4.9  | 1.17 | 13   | 1.21 | 36   | 57    |    |
| F              | Circular | 25.4        | -    | -  | 4.9  | 1.17 | 13   | 2.55 | 36   | 94    |    |
| <hr/>          |          |             |      |    |      |      |      |      |      |       |    |
| Leow<br>(2006) | NF       | Rectangular | 29.0 | 78 | -    | 1.76 | 1.13 | 17   | 0.66 | 46    | 89 |
|                | NF       | Rectangular | 26.0 | 78 | -    | 1.76 | 1.13 | 17   | 0.59 | 45.5  | 68 |
|                | NF       | Rectangular | 28.0 | 78 | -    | 1.76 | 1.13 | 17   | 0.63 | 47.33 | 73 |
|                | NF       | Rectangular | 18.0 | 78 | -    | 1.76 | 1.13 | 17   | 0.46 | 44    | 27 |
|                | NF       | Rectangular | 19.0 | 78 | -    | 1.76 | 1.13 | 17   | 0.52 | 46    | 37 |
|                | NF       | Rectangular | 21.0 | 78 | -    | 1.76 | 1.13 | 17   | 0.54 | 46.5  | 53 |

|            |    |             |      |     |   |      |      |    |      |       |      |
|------------|----|-------------|------|-----|---|------|------|----|------|-------|------|
|            | NF | Rectangular | 29.0 | 78  | - | 1.76 | 1.13 | 17 | 0.67 | 48.6  | 98   |
|            | NF | Rectangular | 25.0 | 78  | - | 1.76 | 1.13 | 12 | 0.71 | 47    | 115  |
|            | NF | Rectangular | 24.0 | 78  | - | 1.76 | 1.13 | 12 | 0.61 | 47    | 89   |
|            | NF | Rectangular | 21.0 | 78  | - | 1.76 | 1.13 | 12 | 0.58 | 47    | 45   |
|            | NF | Rectangular | 18.0 | 78  | - | 1.76 | 1.13 | 12 | 0.57 | 48    | 38   |
|            | NF | Rectangular | 24.0 | 78  | - | 1.76 | 1.13 | 12 | 0.61 | 44    | 88   |
|            | NF | Rectangular | 17.0 | 78  | - | 1.76 | 1.13 | 12 | 0.53 | 47.25 | 32   |
|            | NF | Rectangular | 25.0 | 78  | - | 1.76 | 1.13 | 12 | 0.67 | 46.6  | 102  |
|            | NF | Rectangular | 25.0 | 78  | - | 3.8  | 3.28 | 12 | 0.71 | 44.6  | 43   |
|            | NF | Rectangular | 24.0 | 78  | - | 3.8  | 3.28 | 12 | 0.68 | 46    | 39   |
|            | NF | Rectangular | 19.0 | 78  | - | 3.8  | 3.28 | 12 | 0.61 | 45.3  | 17   |
|            | NF | Rectangular | 21.0 | 78  | - | 3.8  | 3.28 | 12 | 0.61 | 47    | 26   |
|            | NF | Rectangular | 23.0 | 78  | - | 3.8  | 3.28 | 12 | 0.64 | 44    | 27   |
|            | NF | Rectangular | 24.0 | 78  | - | 3.8  | 3.28 | 12 | 0.66 | 48    | 36   |
|            | NF | Rectangular | 24.0 | 78  | - | 3.8  | 3.28 | 12 | 0.66 | 45    | 33   |
|            | NF | Rectangular | 33.5 | 160 | - | 3.1  | 3.56 | 26 | 1.01 | 29    | 70.6 |
|            | NF | Rectangular | 35.0 | 160 | - | 3.1  | 3.56 | 28 | 0.97 | 28    | 69.6 |
|            | NF | Rectangular | 36.0 | 160 | - | 3.1  | 3.56 | 31 | 0.93 | 28.5  | 74.5 |
|            | NF | Rectangular | 37.0 | 160 | - | 3.1  | 3.56 | 38 | 0.91 | 29    | 85.6 |
|            | NF | Rectangular | 36.5 | 160 | - | 3.1  | 3.56 | 35 | 0.92 | 29    | 81.6 |
| Peh (2007) | NF | Rectangular | 36.0 | 160 | - | 3.1  | 3.56 | 38 | 0.87 | 29    | 57.8 |
|            | NF | Rectangular | 37.0 | 160 | - | 3.1  | 3.56 | 38 | 0.86 | 29.3  | 46.1 |
|            | NF | Rectangular | 36.0 | 160 | - | 3.1  | 3.56 | 38 | 0.82 | 29    | 46.1 |
|            | NF | Rectangular | 34.0 | 160 | - | 3.1  | 3.56 | 27 | 0.98 | 29    | 77.9 |
|            | NF | Rectangular | 34.0 | 160 | - | 3.1  | 3.56 | 25 | 0.97 | 29    | 72.6 |
|            | NF | Rectangular | 34.0 | 160 | - | 3.1  | 3.56 | 27 | 0.95 | 29    | 76.7 |
|            | NF | Rectangular | 33.0 | 160 | - | 3.1  | 3.56 | 25 | 0.91 | 29    | 63.4 |

|                   |    |             |      |     |       |      |      |    |      |       |       |
|-------------------|----|-------------|------|-----|-------|------|------|----|------|-------|-------|
|                   | NF | Rectangular | 34.0 | 160 | -     | 3.1  | 3.56 | 26 | 0.96 | 29    | 72.6  |
|                   | NF | Rectangular | 28.0 | 160 | -     | 3.1  | 3.56 | 23 | 0.86 | 29    | 48.3  |
|                   | NF | Trapezoidal | 38.0 | 120 | 1.732 | 4.9  | 1.27 | 26 | 0.87 | 91    | 83    |
|                   | NF | Trapezoidal | 37.5 | 120 | 1.732 | 4.9  | 1.27 | 32 | 0.79 | 45    | 66    |
|                   | NF | Trapezoidal | 45.0 | 120 | 1.732 | 4.9  | 1.27 | 37 | 0.79 | 95    | 69    |
|                   | NF | Trapezoidal | 40.0 | 120 | 1.732 | 4.9  | 1.27 | 33 | 0.89 | 73    | 77    |
|                   | NF | Trapezoidal | 47.0 | 120 | 1.732 | 4.9  | 1.27 | 36 | 0.85 | 71    | 111   |
|                   | NF | Trapezoidal | 48.0 | 120 | 1.732 | 4.9  | 1.27 | 38 | 0.68 | 48    | 78    |
| Tan (2009)        | NF | Trapezoidal | 39.0 | 120 | 1.732 | 4.9  | 1.27 | 39 | 1.01 | 48    | 70    |
|                   | NF | Trapezoidal | 44.0 | 120 | 1.732 | 4.9  | 1.27 | 27 | 0.89 | 48    | 101   |
|                   | NF | Trapezoidal | 39.0 | 120 | 1.732 | 4.9  | 1.27 | 25 | 0.81 | 41.83 | 91    |
|                   | NF | Trapezoidal | 36.0 | 120 | 1.732 | 4.9  | 1.27 | 23 | 0.79 | 45    | 74    |
|                   | NF | Trapezoidal | 39.0 | 120 | 1.732 | 4.9  | 1.27 | 23 | 0.86 | 44    | 87    |
|                   | NF | Trapezoidal | 40.0 | 120 | 1.732 | 4.9  | 1.27 | 30 | 0.87 | 48    | 86    |
|                   | NF | Trapezoidal | 47.0 | 120 | 1.732 | 4.9  | 1.27 | 31 | 0.80 | 85    | 106   |
|                   | NF | Trapezoidal | 33.0 | 120 | 1.732 | 5.2  | 1.26 | 32 | 0.92 | 26    | 70    |
| Ma (2010)         | NF | Trapezoidal | 44.0 | 120 | 1.732 | 5.2  | 1.26 | 35 | 0.88 | 25    | 65    |
|                   | NF | Trapezoidal | 40.0 | 120 | 1.732 | 5.2  | 1.26 | 37 | 0.89 | 24    | 65    |
|                   | NF | Trapezoidal | 41.0 | 120 | 1.732 | 5.2  | 1.26 | 38 | 0.81 | 25    | 59    |
|                   | NF | Triangular  | 58.0 | -   | 1     | 1.63 | 1.19 | 51 | 0.65 | 48    | 100.6 |
|                   | NF | Triangular  | 58.0 | -   | 1     | 1.63 | 1.19 | 53 | 0.73 | 48.2  | 119.6 |
|                   | NF | Triangular  | 58.0 | -   | 1     | 1.63 | 1.19 | 51 | 0.60 | 48    | 79.2  |
| Theodosius (2012) | NF | Triangular  | 58.0 | -   | 1     | 1.63 | 1.19 | 52 | 0.60 | 49.5  | 96.6  |
|                   | NF | Triangular  | 58.0 | -   | 1     | 1.63 | 1.19 | 54 | 0.65 | 48.3  | 99.6  |
|                   | NF | Triangular  | 58.0 | -   | 1     | 1.63 | 1.19 | 56 | 0.69 | 50    | 121.6 |
|                   | NF | Triangular  | 58.0 | -   | 1     | 1.63 | 1.19 | 55 | 0.66 | 48    | 104.6 |
|                   | NF | Triangular  | 63.0 | -   | 1     | 1.63 | 1.19 | 55 | 0.78 | 48.8  | 130.2 |

|            |               |             |      |    |   |       |      |    |      |      |       |
|------------|---------------|-------------|------|----|---|-------|------|----|------|------|-------|
|            | NF            | Triangular  | 58.0 | -  | 1 | 1.63  | 1.19 | 31 | 0.61 | 48   | 76.8  |
|            | NF            | Triangular  | 58.0 | -  | 1 | 1.63  | 1.19 | 40 | 0.72 | 48.2 | 118.2 |
|            | NF            | Triangular  | 58.0 | -  | 1 | 1.63  | 1.19 | 33 | 0.63 | 48   | 77.5  |
|            | NF            | Triangular  | 50.0 | -  | 1 | 1.63  | 1.19 | 34 | 0.71 | 48   | 106.4 |
|            | NF            | Triangular  | 55.0 | -  | 1 | 1.63  | 1.19 | 35 | 0.72 | 48.5 | 118.8 |
|            | NF            | Triangular  | 58.0 | -  | 1 | 1.63  | 1.19 | 23 | 0.73 | 48   | 102   |
|            | NF            | Triangular  | 58.0 | -  | 1 | 1.63  | 1.19 | 22 | 0.75 | 48   | 121   |
|            | NF            | Triangular  | 58.0 | -  | 1 | 1.63  | 1.19 | 19 | 0.60 | 48   | 61.7  |
|            | NF            | Triangular  | 45.0 | -  | 1 | 1.63  | 1.19 | 20 | 0.76 | 48.5 | 102.2 |
|            | NF            | Triangular  | 58.0 | -  | 1 | 1.63  | 1.19 | 19 | 0.57 | 48   | 58.4  |
|            | NF            | Triangular  | 58.0 | -  | 1 | 1.63  | 1.19 | 21 | 0.54 | 48.5 | 65    |
|            | NF            | Triangular  | 58.0 | -  | 1 | 1.63  | 1.19 | 23 | 0.68 | 48.2 | 92.4  |
|            | NF            | Triangular  | 50.0 | -  | 1 | 1.63  | 1.19 | 25 | 0.67 | 50   | 100.6 |
|            | NF            | Rectangular | 32.0 | 50 | - | 1.63  | 1.19 | 17 | 1.12 | 48   | 125   |
|            | NF            | Rectangular | 27.0 | 50 | - | 1.63  | 1.19 | 18 | 0.78 | 48   | 90    |
|            | NF            | Rectangular | 30.0 | 50 | - | 1.63  | 1.19 | 17 | 0.89 | 48   | 101   |
|            | NF            | Rectangular | 20.0 | 50 | - | 1.63  | 1.19 | 10 | 0.65 | 48   | 56    |
|            | NF            | Rectangular | 42.0 | 50 | - | 1.63  | 1.19 | 22 | 0.97 | 48   | 132   |
|            | NF            | Rectangular | 37.0 | 50 | - | 1.63  | 1.19 | 21 | 0.77 | 48   | 102   |
| Tan (2013) | NF            | Rectangular | 32.0 | 50 | - | 1.63  | 1.19 | 20 | 0.77 | 48   | 88    |
|            | NF            | Rectangular | 28.0 | 50 | - | 1.63  | 1.19 | 17 | 0.61 | 48   | 58    |
|            | NF            | Rectangular | 42.0 | 50 | - | 1.63  | 1.19 | 30 | 0.52 | 48   | 63    |
|            | NF            | Rectangular | 44.0 | 50 | - | 1.63  | 1.19 | 31 | 0.55 | 48   | 72    |
|            | NF            | Rectangular | 45.0 | 50 | - | 1.63  | 1.19 | 32 | 0.65 | 48   | 89    |
|            | NF            | Rectangular | 47.0 | 50 | - | 1.63  | 1.19 | 32 | 0.77 | 48   | 105   |
|            | NF            | Rectangular | 50.0 | 50 | - | 1.63  | 1.19 | 37 | 0.43 | 48   | 48    |
|            | Akhtar (2014) | Rectangular | 23.0 | 50 | - | 1.803 | 2.67 | 7  | 0.85 | 47   | 50    |
|            | NF            | Rectangular | 24.0 | 50 | - | 1.803 | 2.67 | 8  | 0.82 | 69   | 58    |

|             |    |             |      |     |     |       |      |    |      |       |      |
|-------------|----|-------------|------|-----|-----|-------|------|----|------|-------|------|
|             | NF | Rectangular | 22.0 | 50  | -   | 1.803 | 2.67 | 10 | 0.85 | 45.5  | 52   |
|             | NF | Rectangular | 23.0 | 50  | -   | 1.803 | 2.67 | 15 | 0.81 | 47    | 49   |
|             | NF | Rectangular | 18.0 | 50  | -   | 1.803 | 2.67 | 15 | 0.76 | 47    | 40   |
|             | NF | Rectangular | 28.0 | 50  | -   | 1.803 | 2.67 | 17 | 0.82 | 49    | 56   |
|             | NF | Rectangular | 29.0 | 50  | -   | 1.803 | 2.67 | 17 | 0.85 | 44.5  | 65   |
|             | NF | Rectangular | 29.0 | 50  | -   | 1.803 | 2.67 | 18 | 0.82 | 94    | 63   |
|             | NF | Rectangular | 37.0 | 50  | -   | 1.803 | 2.67 | 17 | 1.00 | 71    | 82   |
|             | NF | Rectangular | 26.0 | 50  | -   | 1.803 | 2.67 | 23 | 0.68 | 43    | 50   |
|             | NF | Rectangular | 33.0 | 50  | -   | 1.803 | 2.67 | 24 | 0.88 | 47.5  | 70   |
|             | NF | Rectangular | 31.0 | 50  | -   | 1.803 | 2.67 | 23 | 0.79 | 45    | 62   |
|             | NF | Rectangular | 38.0 | 50  | -   | 1.803 | 2.67 | 26 | 0.91 | 70    | 86   |
|             | NF | Rectangular | 40.0 | 50  | -   | 1.803 | 2.67 | 35 | 0.77 | 45    | 68   |
|             | NF | Trapezoidal | 35.2 | 100 | 2.5 | 1.622 | 3.71 | 34 | 0.51 | 49    | 34.3 |
|             | NF | Trapezoidal | 30.6 | 100 | 2.5 | 1.622 | 3.71 | 23 | 0.67 | 45    | 60.2 |
|             | NF | Trapezoidal | 33.9 | 100 | 2.5 | 1.622 | 3.71 | 24 | 0.70 | 71    | 60.4 |
|             | NF | Trapezoidal | 35.5 | 100 | 2.5 | 1.622 | 3.71 | 26 | 0.73 | 46    | 64.8 |
|             | NF | Trapezoidal | 28.5 | 100 | 2.5 | 1.622 | 3.71 | 21 | 0.63 | 45    | 52.5 |
|             | NF | Trapezoidal | 26.6 | 100 | 2.5 | 1.622 | 3.71 | 21 | 0.60 | 44    | 29.4 |
|             | NF | Trapezoidal | 54.0 | 100 | 2.5 | 1.622 | 3.71 | 43 | 0.72 | 45    | 102  |
|             | NF | Trapezoidal | 48.5 | 100 | 2.5 | 1.622 | 3.71 | 46 | 0.70 | 45    | 97.1 |
|             | NF | Trapezoidal | 25.7 | 100 | 2.5 | 1.686 | 3.83 | 18 | 0.59 | 48.67 | 46.2 |
|             | NF | Trapezoidal | 25.0 | 100 | 2.5 | 1.686 | 3.83 | 19 | 0.73 | 48    | 53.3 |
|             | NF | Trapezoidal | 29.1 | 100 | 2.5 | 1.686 | 3.83 | 24 | 0.70 | 48.75 | 56   |
| Miao (2015) | NF | Trapezoidal | 30.5 | 100 | 2.5 | 1.686 | 3.83 | 25 | 0.73 | 71.5  | 61.4 |
|             | NF | Trapezoidal | 81.5 | 100 | 2.5 | 1.686 | 3.83 | 81 | 0.32 | 49.5  | 50   |
|             | NF | Trapezoidal | 53.3 | 100 | 2.5 | 1.686 | 3.83 | 53 | 0.36 | 45.6  | 44.4 |
|             | NF | Trapezoidal | 55.5 | 100 | 2.5 | 1.686 | 3.83 | 55 | 0.51 | 50    | 48.7 |

|              |             |             |      |     |      |       |      |      |       |       |       |
|--------------|-------------|-------------|------|-----|------|-------|------|------|-------|-------|-------|
|              | NF          | Trapezoidal | 56.3 | 100 | 2.5  | 1.686 | 3.83 | 55   | 0.56  | 72    | 51.3  |
|              | NF          | Trapezoidal | 36.9 | 100 | 2.5  | 1.686 | 3.83 | 36   | 0.59  | 48    | 61    |
|              | NF          | Trapezoidal | 36.7 | 100 | 2.5  | 1.686 | 3.83 | 36   | 0.54  | 48    | 61.4  |
|              | NF          | Trapezoidal | 36   | 100 | 2.5  | 1.686 | 3.83 | 36   | 0.56  | 46    | 52    |
| Das (2015)   | NF          | Trapezoidal | 18.0 | 50  | 1    | 0.49  | 1.47 | 17   | 0.50  | 69    | 51    |
|              | NF          | Trapezoidal | 41.5 | 50  | 1    | 0.49  | 1.47 | 42   | 0.36  | 72    | 63    |
|              | NF          | Trapezoidal | 41.0 | 50  | 1    | 0.49  | 1.47 | 42   | 0.33  | 47    | 51    |
|              | NF          | Trapezoidal | 41.0 | 50  | 1    | 0.49  | 1.47 | 42   | 0.36  | 51    | 56    |
|              | NF          | Trapezoidal | 41.0 | 50  | 1    | 0.49  | 1.47 | 40   | 0.34  | 48.5  | 63    |
|              | NF          | Trapezoidal | 20.0 | 50  | 1    | 0.49  | 1.47 | 20   | 0.44  | 48    | 76    |
|              | NF          | Trapezoidal | 21.0 | 50  | 1    | 0.49  | 1.47 | 21   | 0.51  | 45    | 77    |
|              | NF          | Trapezoidal | 20.0 | 50  | 1    | 0.49  | 1.47 | 13   | 0.69  | 45.5  | 129.1 |
|              | NF          | Trapezoidal | 52.0 | 50  | 1    | 0.49  | 1.47 | 49   | 0.44  | 19    | 81    |
|              | NF          | Trapezoidal | 50.4 | 50  | 1    | 0.49  | 1.47 | 49   | 0.37  | 46.5  | 81.3  |
|              | NF          | Trapezoidal | 48.5 | 50  | 1    | 0.49  | 1.47 | 48   | 0.35  | 43    | 67    |
|              | NF          | Trapezoidal | 17.0 | 50  | 1    | 0.49  | 1.47 | 10   | 0.63  | 45.75 | 74    |
|              | NF          | Trapezoidal | 18.0 | 50  | 1    | 0.49  | 1.47 | 11   | 0.67  | 46.75 | 86    |
|              | NF          | Trapezoidal | 22.0 | 50  | 1    | 0.49  | 1.47 | 22   | 0.59  | 47.5  | 80    |
|              | NF          | Trapezoidal | 41.0 | 50  | 1    | 0.49  | 1.47 | 41   | 0.31  | 47.25 | 48.5  |
|              | NF          | Trapezoidal | 50.0 | 50  | 1    | 0.49  | 1.47 | 50   | 0.30  | 43.5  | 49    |
|              | NF          | Rectangular | 41.2 | 50  | -    | 0.49  | 1.47 | 41   | 0.37  | 43.5  | 63.5  |
|              | NF          | Rectangular | 39.6 | 50  | -    | 0.49  | 1.47 | 40   | 0.34  | 47.83 | 53.2  |
| NF           | Rectangular | 40.8        | 50   | -   | 0.49 | 1.47  | 41   | 0.34 | 46.66 | 57.1  |       |
| NF           | Rectangular | 40.0        | 50   | -   | 0.49 | 1.47  | 40   | 0.45 | 39.75 | 75.2  |       |
| Current data | NF          | Rectangular | 49.7 | 50  | -    | 0.5   | 1.45 | 50   | 0.40  | 47    | 65    |
|              | NF          | Rectangular | 51.0 | 50  | -    | 0.5   | 1.45 | 52   | 0.48  | 48    | 91.5  |
|              | NF          | Rectangular | 50.7 | 50  | -    | 0.5   | 1.45 | 51   | 0.32  | 42    | 55    |

|    |             |       |    |   |     |      |     |      |      |       |
|----|-------------|-------|----|---|-----|------|-----|------|------|-------|
| NF | Rectangular | 51.1  | 50 | - | 0.5 | 1.45 | 51  | 0.35 | 49   | 59.3  |
| NF | Rectangular | 50.6  | 50 | - | 0.5 | 1.45 | 51  | 0.30 | 41   | 48.7  |
| NF | Rectangular | 50.5  | 50 | - | 0.5 | 1.45 | 51  | 0.53 | 44   | 96    |
| NF | Rectangular | 40.1  | 50 | - | 0.5 | 1.45 | 40  | 0.49 | 48   | 74    |
| NF | Rectangular | 41.8  | 50 | - | 0.5 | 1.45 | 42  | 0.56 | 44   | 94.5  |
| NF | Rectangular | 40.9  | 50 | - | 0.5 | 1.45 | 41  | 0.34 | 47   | 60    |
| NF | Rectangular | 41.0  | 50 | - | 0.5 | 1.45 | 41  | 0.38 | 43   | 67    |
| NF | Rectangular | 32.2  | 50 | - | 0.5 | 1.45 | 31  | 0.61 | 48   | 95.5  |
| NF | Rectangular | 31.3  | 50 | - | 0.5 | 1.45 | 31  | 0.51 | 47   | 75    |
| NF | Rectangular | 30.6  | 50 | - | 0.5 | 1.45 | 31  | 0.38 | 47   | 55.3  |
| NF | Rectangular | 31.7  | 50 | - | 0.5 | 1.45 | 32  | 0.45 | 51   | 72.4  |
| NF | Rectangular | 21.5  | 50 | - | 0.5 | 1.45 | 21  | 0.59 | 50   | 73    |
| NF | Rectangular | 20.4  | 50 | - | 0.5 | 1.45 | 21  | 0.49 | 48   | 63    |
| NF | Rectangular | 21.7  | 50 | - | 0.5 | 1.45 | 22  | 0.51 | 46   | 57.1  |
| NF | Rectangular | 23.9  | 50 | - | 0.5 | 1.45 | 22  | 0.60 | 41   | 81.4  |
| NF | Rectangular | 25.2  | 50 | - | 0.5 | 1.45 | 23  | 0.62 | 46.5 | 80    |
| NF | Rectangular | 26.8  | 50 | - | 0.5 | 1.45 | 23  | 0.68 | 44.5 | 100.5 |
| NF | Rectangular | 17.7  | 50 | - | 0.5 | 1.45 | 6   | 0.71 | 44   | 90.4  |
| NF | Rectangular | 19.8  | 50 | - | 0.5 | 1.45 | 7   | 0.72 | 44   | 105.8 |
| NF | Rectangular | 15.7  | 50 | - | 0.5 | 1.45 | 7   | 0.67 | 48   | 81.5  |
| NF | Rectangular | 101.0 | 50 | - | 0.5 | 1.45 | 101 | 0.29 | 120  | 71    |
| NF | Rectangular | 101.7 | 50 | - | 0.5 | 1.45 | 102 | 0.49 | 94   | 111   |
| NF | Rectangular | 100.7 | 50 | - | 0.5 | 1.45 | 101 | 0.39 | 87   | 83.5  |
| NF | Rectangular | 100.0 | 50 | - | 0.5 | 1.45 | 100 | 0.33 | 89.5 | 80.3  |
| NF | Rectangular | 80.2  | 50 | - | 0.5 | 1.45 | 80  | 0.31 | 92   | 62.3  |
| NF | Rectangular | 80.8  | 50 | - | 0.5 | 1.45 | 81  | 0.35 | 71   | 64.5  |
| NF | Rectangular | 80.3  | 50 | - | 0.5 | 1.45 | 81  | 0.41 | 70   | 78    |

---

|    |             |      |    |   |     |      |    |      |    |      |
|----|-------------|------|----|---|-----|------|----|------|----|------|
| NF | Rectangular | 80.5 | 50 | - | 0.5 | 1.45 | 81 | 0.45 | 64 | 88.5 |
| NF | Rectangular | 53.0 | 50 | - | 0.5 | 1.45 | 53 | 0.48 | 41 | 79   |

---
